# Supplementary material for: Radiation-induced alterations in immunogenicity of a murine pancreatic ductal adenocarcinoma cell line
Source: PubMed Central journal article supplement (PMC6971029; doi:10.1038/s41598-020-57456-2), 2020-01-20
Supplement: 41598_2020_57456_MOESM1_ESM.pdf [file 41598_2020_57456_MOESM1_ESM.pdf]

## Supplementary Material to the article

### Radiation-induced alterations in immunogenicity of a murine pancreatic ductal adenocarcinoma cell line

Philipp Schröter<sup>1,2,3,4</sup>, Laura Hartmann<sup>1,5</sup>, Wolfram Osen<sup>1</sup>, Daniel Baumann<sup>6,7</sup>, Rienk Offringa<sup>6,7</sup>, David Eisel<sup>1,5,8</sup>, Jürgen Debus<sup>2,3,4</sup>, Stefan B. Eichmüller<sup>1\*</sup> and Stefan Rieken<sup>2,3,4\*</sup>

- <sup>1</sup> German Cancer Research Center (DKFZ), Research Group GMP & T Cell Therapy, Im Neuenheimer Feld 280, D-69120 Heidelberg, Germany
  - <sup>2</sup> University Hospital Heidelberg, Department of Radiation Oncology, Im Neuenheimer Feld 400, D-69120 Heidelberg, Germany
  - <sup>3</sup> Heidelberg Institute of Radiation Oncology (HIRO), Im Neuenheimer Feld 280, D-69120 Heidelberg, Germany
  - <sup>4</sup> Heidelberg Ion-Beam Therapy Center (HIT), Im Neuenheimer Feld 450, D-69120 Heidelberg, Germany
  - <sup>5</sup> Faculty of Biosciences, University Heidelberg, Heidelberg, Germany
  - <sup>6</sup> German Cancer Research Center (DKFZ), Molecular Oncology of Gastrointestinal Tumors, Im Neuenheimer Feld 280, D-69120 Heidelberg, Germany
  - <sup>7</sup> University Hospital Heidelberg, Department of Surgery, Im Neuenheimer Feld 110, D-69120 Heidelberg, Germany
  - <sup>8</sup> present address: Biopharmaceutical New Technologies (BioNTech) Corporation, Mainz, Germany
- \* SBE and SR contributed equally

Correspondence and requests for material should be addressed to SBE  
([s.eichmueller@dkfz.de](mailto:s.eichmueller@dkfz.de))

## Supplementary Methods

### RNA isolation and quantitative PCR:

Cells were seeded in T25 flasks at 14 h prior to treatment. Twelve and 36 h after treatment with 1, 3, 5 or 10 Gy, cells were harvested, pelleted and shock-frosted with liquid nitrogen. RNA was isolated using the RNeasy Mini Kit (Qiagen, Hilden, Germany) according to manufacturer's instructions and subjected to reverse transcription using Transcriptor First Strand cDNA Synthesis Kit (Hoffmann-La Roche, Basel, Switzerland). Gene expression was quantified using quantitative PCR. Therefore, 2 X Power SYBR® Green PCR Master Mix (Thermo Fisher), 10 ng cDNA, 400 nM of each primer pair (200 nM each) and nuclease-free water were mixed to a total volume of 20 µl. The selected genes were amplified using the ABI 7300 Real-time PCR System (Applied Biosystems, Foster City, USA) and subsequently quantified by normalization to Rpl19. Primers used for quantitative PCR are depicted in Supplementary Table S2.

### Western blotting:

For the preparation of whole cell protein samples, cells were harvested, counted and resuspended in an appropriate amount of Cell Lysis Buffer ( $2.5 \times 10^4$  cells per µl) supplemented with 1 mM Phenylmethylsulfonylfluorid (PMSF). The samples were stored on ice for 10 min and subsequently centrifuged at 4 °C and 14,000 x g for 20 min. Supernatants were transferred into fresh tubes, mixed with 5 X protein loading buffer and heat denatured at 95 °C for 10 minutes. Whole cell protein samples were separated on a 12 % polyacrylamide gel (20 min at 80 V followed by 1.5 h at 120 V) and proteins were electro-transferred onto nitrocellulose membranes using the Trans-Blot Turbo Transfer System. The membranes were blocked with 5 % of non-fat milk in Tris-buffered saline containing 0.05 % Tween (Blocking buffer) for 1 h. Subsequently, the membranes were incubated overnight at 4 °C with an OVA specific antibody diluted 1:1000 in blocking buffer. Next, membranes were incubated at RT for 1 h with a horseradish peroxidase (HRP) conjugated secondary antibody diluted 1:5000 in blocking buffer. Protein signals were detected by adding ECL Prime Western Blotting Detection Reagent directly on the membrane and exposing blots to a charge-coupled device (CCD)-camera. Afterwards the membranes were incubated at RT for 1 h with an actin specific antibody diluted 1:10000 in blocking buffer. Subsequently, the membranes were incubated a second time at RT for 1 h with a HRP conjugated antibody diluted 1:5000 in blocking solution and analysed using the ChemiDoc™ XRS+ System after adding detection reagent. Antibodies used for Western blotting are depicted in Supplementary Table S3. Data were analysed using the Image Lab Software.

## Supplementary Tables

**Supplementary Table S1:** Monoclonal antibodies used for immunofluorescence staining and flow cytometry

| Specificity       | Conjugate            | Cat. No. | Manufacturer | Clone       |
|-------------------|----------------------|----------|--------------|-------------|
| H2-D <sup>b</sup> | PerCP/Cy5.5          | 111517   | Biolegend    | KH95        |
| I-A <sup>b</sup>  | APC                  | 107613   | Biolegend    | M5/114.15.2 |
| CD274 / PD-L1     | Brilliant Violet 785 | 124331   | Biolegend    | 10F.9G2     |
| CD73              | APC/Fire 750         | 127221   | Biolegend    | TY/11.8     |
| CD184 / CXCR4     | APC                  | 146507   | Biolegend    | L276F12     |
| CD8               | PE/Cy7               | 100721   | Biolegend    | 53-6.7      |
| CD279 / PD-1      | APC                  | 135209   | Biolegend    | 29F.1A12    |

### Isotype controls

| Specificity   | Conjugate            | Cat. No. | Manufacturer | Clone   |
|---------------|----------------------|----------|--------------|---------|
| Isotype Ctrl. | PerCP/Cy5.5          | 400337   | Biolegend    | MPC-11  |
| Isotype Ctrl. | APC                  | 400611   | Biolegend    | RTK4530 |
| Isotype Ctrl. | Brilliant Violet 785 | 400647   | Biolegend    | RTK4530 |
| Isotype Ctrl. | APC/Fire 750         | 400455   | Biolegend    | RTK2071 |
| Isotype Ctrl. | APC                  | 400611   | Biolegend    | RTK4530 |

**Supplementary Table S2:** Primers used for quantitative PCR

| Target           | Primer      | Sequence (5'-3')        | Product size [bp] | Efficiency <sup>(*)</sup> | Source                       |
|------------------|-------------|-------------------------|-------------------|---------------------------|------------------------------|
| Rpl19            | Rpl19_fw69  | TACCGGGAATCCAAGAAGATTGA | 89                | 98.1                      | PrimerBank ID<br>226958656c3 |
|                  | Rpl19_rev70 | AGGATGCGCTTGTTCCTTGAAC  |                   |                           |                              |
| CD274            | PD-L1_fwd   | TCGCCTGCAGATAGTTCCC     | 133               | 94.6                      | this paper                   |
|                  | PD-L1_rev   | TGACGTTGCTGCCATACTCC    |                   |                           |                              |
| CD73             | NT5E_fwd    | GCATTCCTGAAGATGCGACC    | 91                | 100.7                     | this paper                   |
|                  | NT5E_rev    | ATCGTTCTCCCGAGTTCCTG    |                   |                           |                              |
| MHC-I<br>(H2-D1) | H2-D1_fwd   | GTGCTGCAGAGCATTACAAGG   | 110               | 91.6                      | this paper                   |
|                  | H2-D1_rev   | TGCCTTTGGGGAATCTGTGC    |                   |                           |                              |

<sup>(\*)</sup>All primers used for qPCR were tested for their amplification efficiency using a standard curve that is based on a dilution series of a cDNA sample. The efficiency was calculated using the slope of the standard curve and the following formula: Efficiency =  $(10^{(-1/\text{slope})} - 1) * 100$

**Supplementary Table S3:** Antibodies used for Western blotting

| Antigen   | Reactivity | Coupled | Dilution | Cat. No. | Manufacturer             | Clone      | Isotype | Organism |
|-----------|------------|---------|----------|----------|--------------------------|------------|---------|----------|
| Actin     | mouse      | -       | 10000    | 691001   | MP Biomedicals           | C4         | IgG1    | mouse    |
| IgG       | mouse      | HRP     | 5000     | sc-2005  | Santa Cruz Biotechnology | polyclonal | -       | goat     |
| Ovalbumin | chicken    | -       | 1000     | sc-65984 | Santa Cruz Biotechnology | 3G2E1D9    | IgG1    | mouse    |

## Supplementary Figures

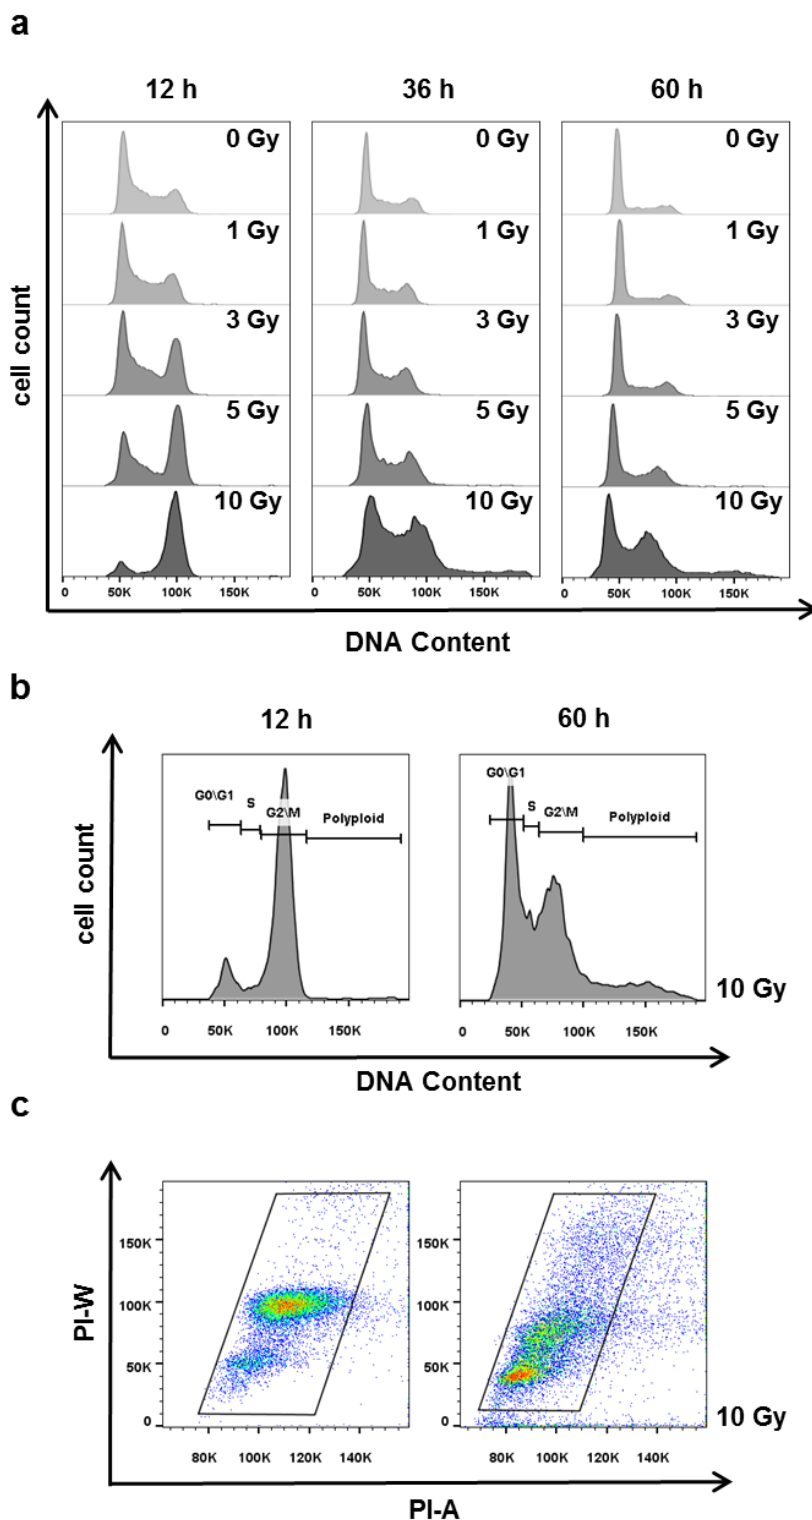

**Supplementary Figure S1. Cell cycle analysis of PDA30364/OVA cells after photon irradiation.** (a) DNA Quantification of PDA30364/OVA cells 12, 36 and 60 h after irradiation with single doses of 1, 3, 5 or 10 Gy by propidium iodide staining and consecutive flow cytometric analysis. (b, c) Analysis of irradiated PDA30364/OVA cells 12 h (left) and 60 h (right) after irradiation with 10 Gy. (b) Definition of cell cycle phases based on cellular DNA content. (c) Induction of polyploidy. Gating strategy: cells (FSC-A vs SSC-A) → single cells (PI-A vs. PI-W) → marker vs. count.

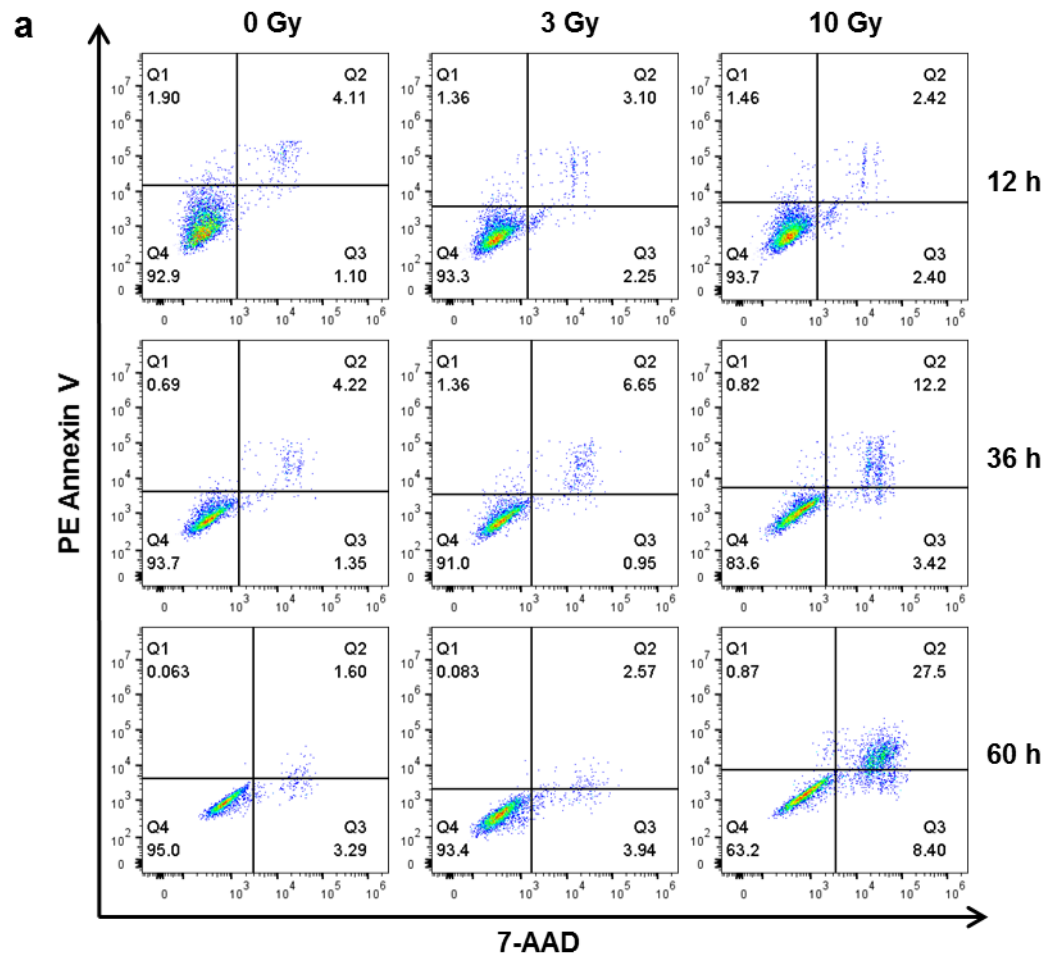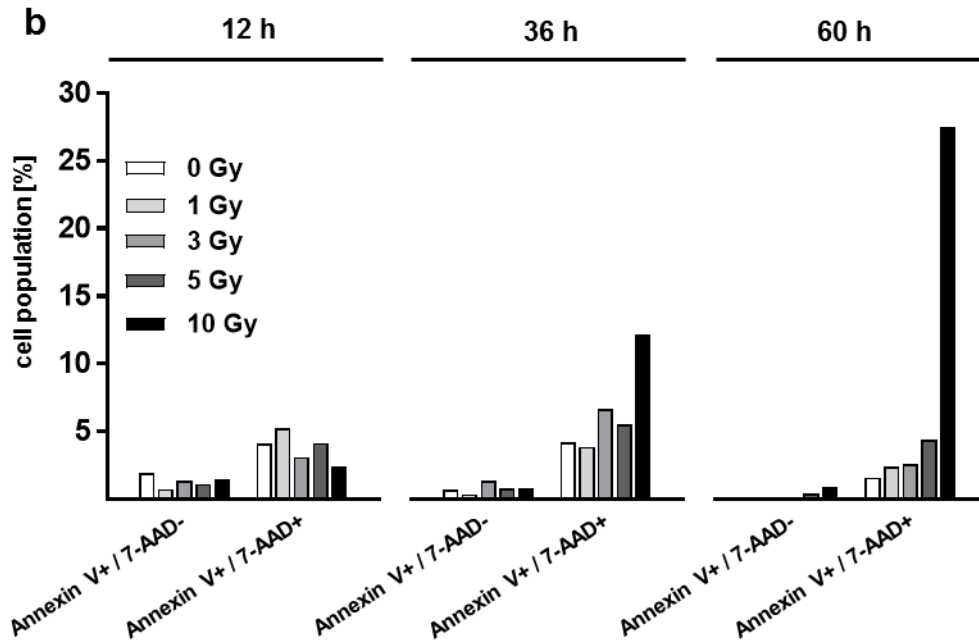

**Supplementary Figure S2. Early and late apoptosis/necrosis induction in PD30364/OVA cells after photon irradiation. (a)** Exemplary of PE Annexin V/7-AAD stained PDA30364/OVA cells 12, 36 and 60 h following irradiation with single doses of 1, 3 or 10 Gy. **(b)** Quantification of early apoptosis (Annexin V+ / 7-AAD-) and late apoptosis/necrosis (Annexin V+ / 7-AAD+) for all treatment conditions and time points. Gating strategy: cells (FSC-A vs SSC-A) → single cells (FSC-A vs FSC-H) → 7-AAD-A vs PE Annexin V-A.

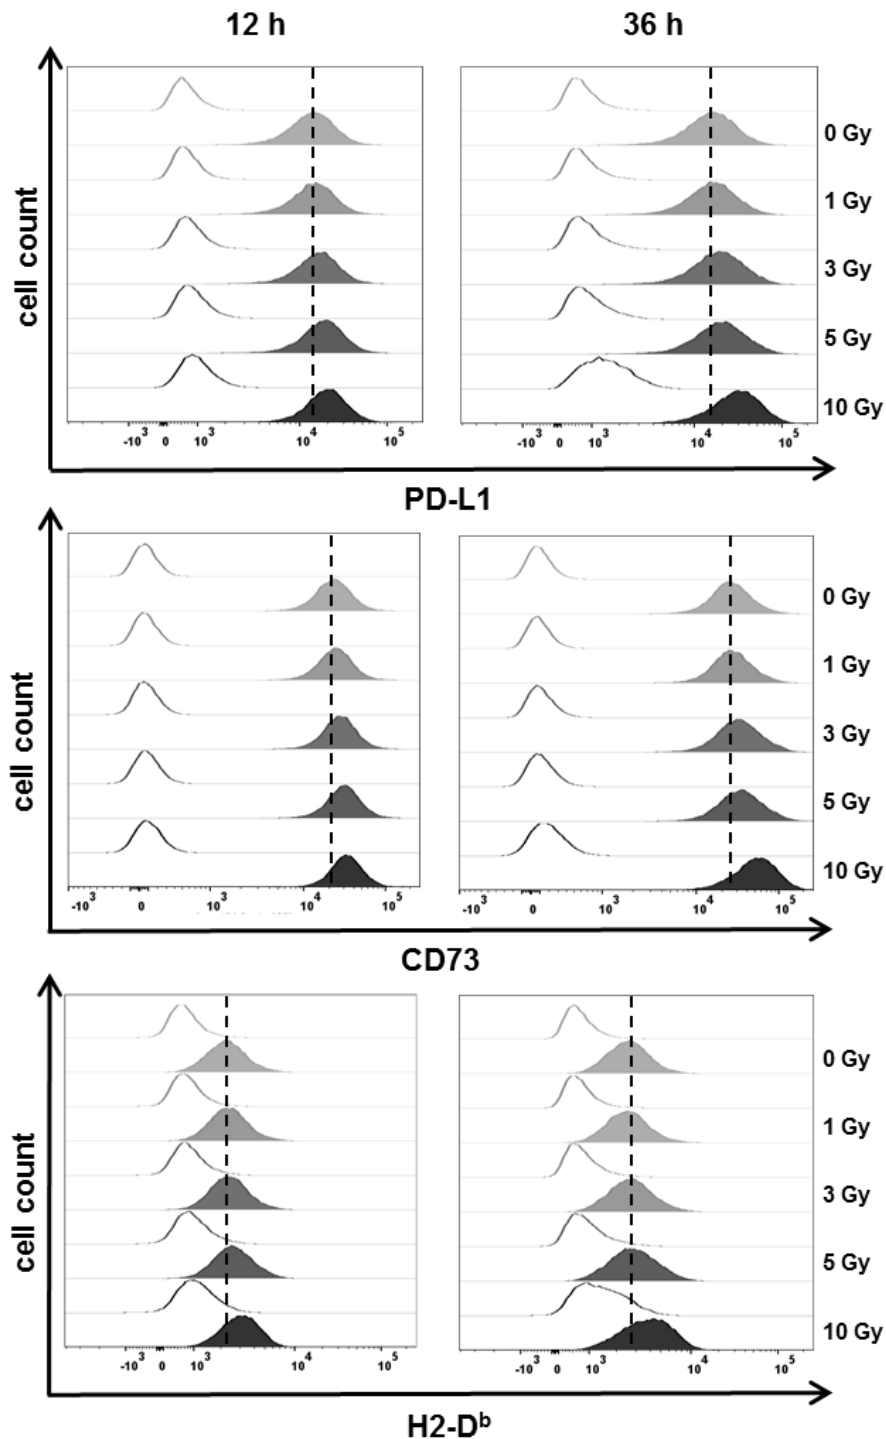

**Supplementary Figure S3. Analysis of PD-L1, CD73 and MHC-I (H2-D<sup>b</sup>) surface expression by PDA30364/OVA cells after photon irradiation.** Flow cytometric analysis of PD-L1, CD73 and MHC-I (H2-D<sup>b</sup>) surface expression 12 and 36 h after irradiation with single doses of 1, 3, 5 or 10 Gy. Gating strategy: cells (FSC-A vs SSC-A) → single cells (FSC-A vs. FSC-H) → living cells (Zombie Violet DCM vs. SSC-A) → marker vs. count. Empty histograms show combined FMO and isotype controls, filled histograms represent the stained sample.

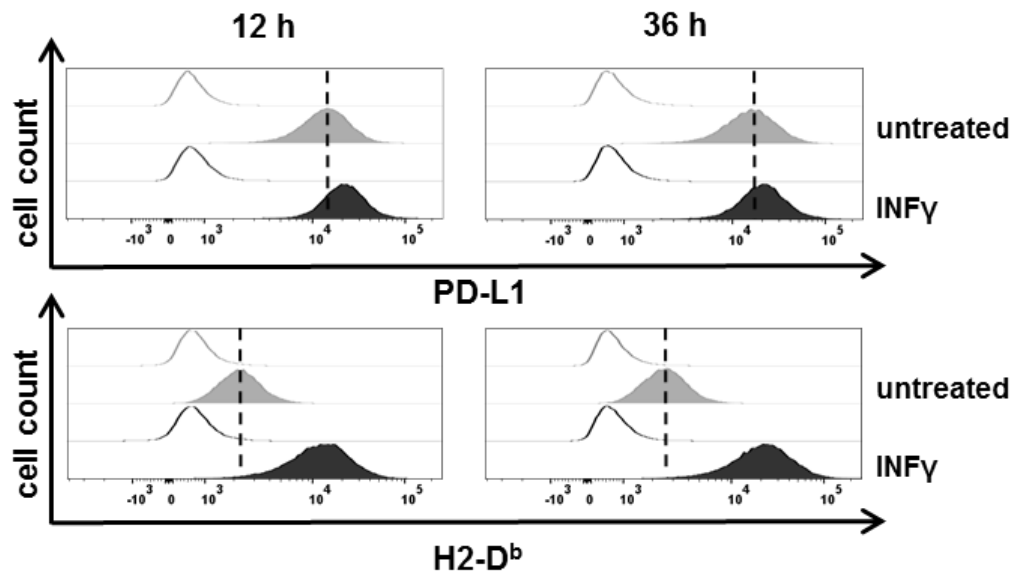

**Supplementary Figure S4. Analysis of PD-L1 and MHC-I (H2-D<sup>b</sup>) surface expression by PDA30364/OVA cells after treatment with murine IFN $\gamma$ .** Flow cytometric analysis of PD-L1 and MHC-I (H2-D<sup>b</sup>) surface expression after treatment with murine IFN $\gamma$  for 36 h prior to flow cytometric analysis to control for inducibility of expression. Gating strategy: cells (FSC-A vs SSC-A) → single cells (FSC-A vs. FSC-H) → living cells (Zombie Violet DCM vs. SSC-A) → marker vs. count. Empty histograms show combined FMO and isotype controls, filled histograms represent the stained sample.



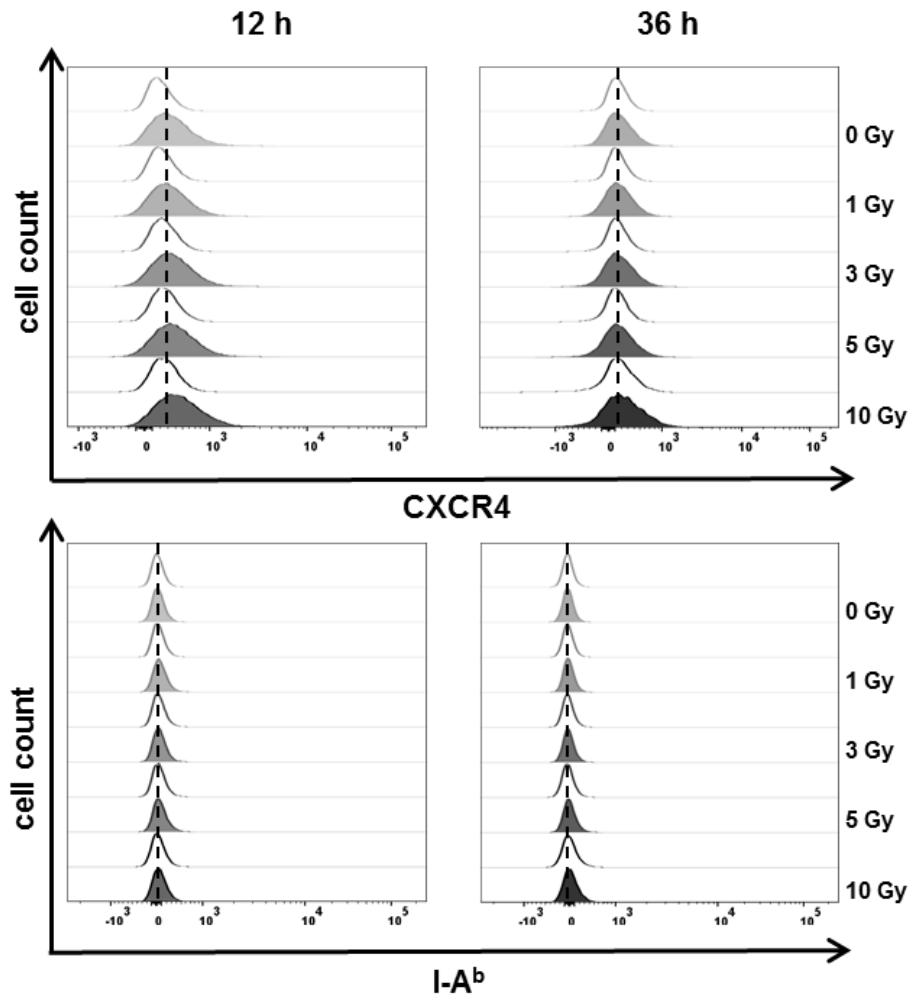

**Supplementary Figure S5. Analysis of CXCR4 and MHC-II (I-A<sup>b</sup>) surface expression by PDA30364/OVA cells after photon irradiation.** Flow cytometric analysis of CXCR4 and MHC-II (I-A<sup>b</sup>) surface expression 12 and 36 h after irradiation with single doses of 1, 3, 5 or 10 Gy. Gating strategy: cells (FSC-A vs SSC-A) → single cells (FSC-A vs. FSC-H) → living cells (Zombie Violet DCM vs. SSC-A) → marker vs. count. Empty histograms show isotype controls, filled histograms represent the stained sample.

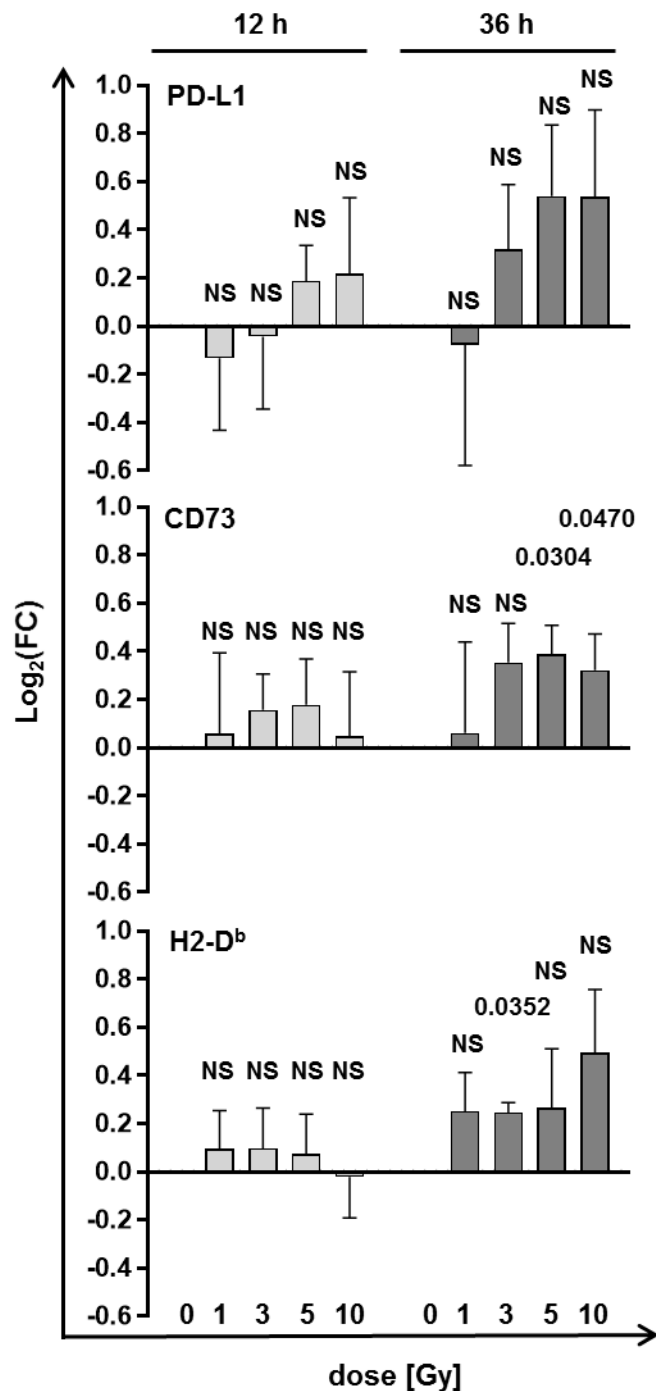

**Supplementary Figure S6. Analysis of PD-L1, CD73 and MHC-I (H2-D<sup>b</sup>) gene expression by PDA30364/OVA cells after photon irradiation.** Quantitative PCR analysis of PD-L1, CD73 and MHC-I (H2-D<sup>b</sup>) gene expression 12 and 36 h after irradiation with single doses of 1, 3, 5 or 10 Gy. Changes in target gene expression were normalized to the housekeeping gene Rpl19 and fold changes of target gene expression over control (0 Gy) were log<sub>2</sub>-transformed. Mean values ± SD of 3 (H2-D<sup>b</sup>) or 4 (PD-L1 and CD73) independent experiments each performed in technical triplicates are shown. The Log<sub>2</sub>(FC) of target gene expression for each treatment and time point was tested against the hypothetical value of 0 using a two-tailed one-sample *t* test and correction of P values for multiple testing was done by Holm-Bonferroni method. Multiplicity adjusted P values are shown,  $\alpha = 0.05$ .

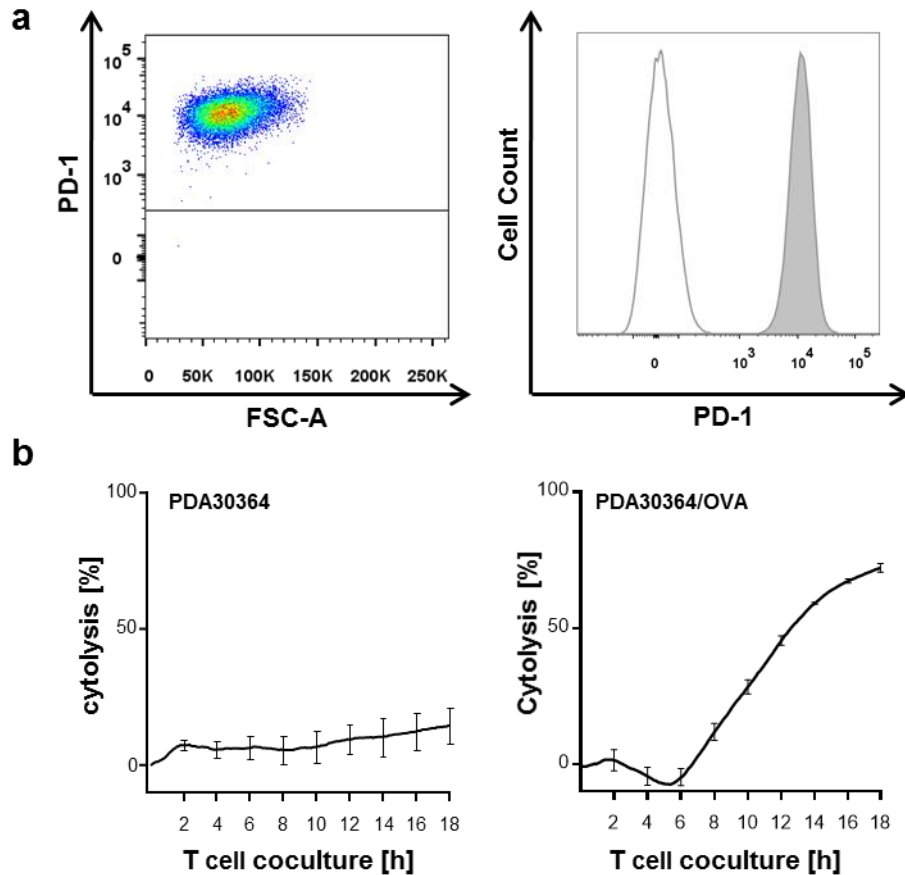

**Supplementary Figure S7. Characterization of the OVA specific CTL line. (a)** OVA-specific CTLs are PD-1 positive (left). Gating of positive cells was based on FMO control. Empty histogram shows FMO control, filled histogram represents the stained sample (right). Gating strategy: living cells (FSC-A vs. Zombie Violet DCM) → CD8a+ cells (FSC-A vs. CD8a) → PD-1+ cells (FSC-A vs. PD-1). **(b)** OVA-specific CTLs kill ovalbumin expressing PDA30364/OVA cells, but not parental PDA30364 cells.

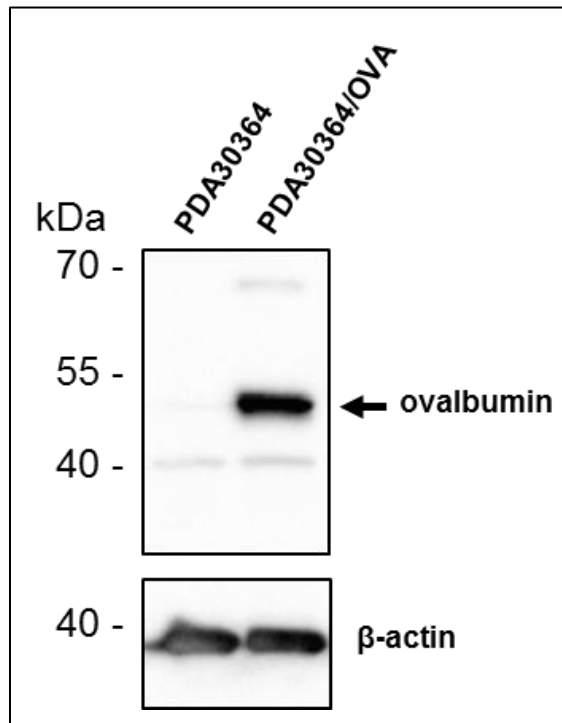

**Supplementary Figure S8. Detection of ovalbumin expression in PDA30364/OVA cells.** Protein extracts of the PDA30364/OVA transfectant clone and of parental PDA30364 cells were analysed by Western blotting. Molecular weight of OVA including 3X FLAG tags comprises 45.83 kDa.
